# Supplementary material for: Barriometry – an enhanced database of accurate barrier heights for gas-phase reactions
Source: Royal Society of Chemistry journal article supplement (doi:10.1039/c7cp08045j), 2018-01-01
Supplement: c7cp08045j2.xlsx [file c7cp08045j2.xlsx]

## Sheet: TOC
Supporting Information for:
Barriometry – an enhanced database of accurate barrier heights for gas-phase reactions
Bun Chan and John M. Simmie
Graduate School of Engineering, Nagasaki University, Bunkyo 1-14, Nagasaki 852-8521, Japan
School of Chemistry, National University of Ireland, Galway, Ireland H91 TK33
Table of Contents
Table S1. Zero-point vibrational energies (kJ mol–1), W2X and W3X-L vibrationless energies (hartree) for species in the ATBH76 set, and the corresponding reaction energies (kJ mol–1)
Table S2. Zero-point vibrational energies (kJ mol–1), W2X and W3X-L vibrationless energies (hartree) for the species in the "CO3" set, and the corresponding reaction energies (kJ mol–1)
Table S3. Zero-point vibrational energies (kJ mol–1), W2X and W3X-L vibrationless energies (hartree) for the species in the vinylperoxy radical set, and the corresponding reaction energies (kJ mol–1)
Brief instructions on how to use this spreadsheet
(1) Run the calculations with geometries supplied in the zip archive
(2) Copy the energies into designated areas marked by the red subtitle in the appropriate table(s)
(3) Duplicate the equations in the area marked by blue subtitle to calculate the reaction energies

## Sheet: Table S1
Table S1. Zero-point vibrational energies (kJ mol–1), W2X and W3X-L vibrationless energies (hartree) for species in the ATBH76 set, and the corresponding reaction energies (kJ mol–1)
Computed vibrationless energies go here, NA should always be zero
Species				ZPVE	W2X	W3X-L
NA				0	0	0
HTBH_C2H5				154.238	-79.1871	-79.188
HTBH_C2H6				193.718	-79.8607	-79.8615
HTBH_C5H8				293.522	-195.399	-195.401
HTBH_CH3				77.2174	-39.8527	-39.8532
HTBH_CH4				116.156	-40.532	-40.5324
HTBH_Cl				0	-461.496	-461.496
HTBH_F				0	-99.8257	-99.8259
HTBH_H2O				55.3398	-76.4939	-76.4943
HTBH_H2S				39.49	-400.432	-400.433
HTBH_H2				26.1908	-1.17429	-1.17429
HTBH_HCl				17.7013	-462.167	-462.167
HTBH_HF				24.2473	-100.551	-100.551
HTBH_HS				16.0297	-399.779	-399.78
HTBH_H				0	-0.499953	-0.499953
HTBH_NH2				49.7069	-55.912	-55.9126
HTBH_NH3				89.0218	-56.5959	-56.5964
HTBH_NH				19.62	-55.2537	-55.2542
HTBH_OH				22.1224	-75.7936	-75.7941
HTBH_O				0	-75.1232	-75.1235
HTBH_PH2				35.1765	-343.277	-343.278
HTBH_PH3				62.6396	-343.916	-343.917
HTBH_TS01				14.4703	-462.659	-462.659
HTBH_TS02				50.5256	-76.9593	-76.9601
HTBH_TS03				110.489	-41.008	-41.0087
HTBH_TS04				132.009	-116.315	-116.317
HTBH_TS05				23.1334	-1.65874	-1.65876
HTBH_TS06				108.971	-132.384	-132.385
HTBH_TS07				98.9587	-502.017	-502.018
HTBH_TS08				209.7	-155.648	-155.65
HTBH_TS09				23.9703	-100.998	-100.998
HTBH_TS10				102.363	-115.632	-115.633
HTBH_TS11				61.0053	-344.412	-344.413
HTBH_TS12				18.8116	-76.2762	-76.2769
HTBH_TS13				37.0274	-400.926	-400.927
HTBH_TS14				9.59952	-537.273	-537.276
HTBH_TS15				128.191	-95.7506	-95.7517
HTBH_TS16				204.21	-135.084	-135.086
HTBH_TS17				239.982	-135.755	-135.756
HTBH_TS18				164.323	-96.4218	-96.4228
HTBH_TS19				284.206	-195.335	-195.337
NHTBH_C2H4				131.983	-78.6233	-78.6242
NHTBH_CH3CH2CH2				229.535	-118.518	-118.52
NHTBH_CH3CH2				154.238	-79.1871	-79.188
NHTBH_CH3Cl				98.253	-501.489	-501.49
NHTBH_CH3F				102.153	-139.862	-139.863
NHTBH_CH3OH				133.216	-115.803	-115.804
NHTBH_CH3				77.2174	-39.8527	-39.8532
NHTBH_CO				12.6754	-113.399	-113.4
NHTBH_Cl-				0	-461.63	-461.63
NHTBH_ClCH3Clcomp				98.9867	-963.136	-963.138
NHTBH_Cl				0	-461.496	-461.496
NHTBH_F-				0	-99.951	-99.9513
NHTBH_F2				5.94443	-199.712	-199.714
NHTBH_FCH3Clcomp1				98.8334	-601.465	-601.467
NHTBH_FCH3Clcomp2				103.174	-601.507	-601.508
NHTBH_FCH3Fcomp				103.102	-239.835	-239.836
NHTBH_FCl				4.68764	-561.421	-561.422
NHTBH_F				0	-99.8257	-99.8259
NHTBH_HCN				41.3676	-93.4827	-93.4837
NHTBH_HCO				33.7502	-113.93	-113.931
NHTBH_HCl				17.7013	-462.167	-462.167
NHTBH_HF				24.2473	-100.551	-100.551
NHTBH_HN2				35.3593	-110.1	-110.101
NHTBH_HNC				40.1113	-93.4587	-93.4596
NHTBH_HOCH3Fcomp1				130.978	-215.802	-215.803
NHTBH_HOCH3Fcomp2				127.151	-215.744	-215.745
NHTBH_H				0	-0.499953	-0.499953
NHTBH_N2O				28.1616	-184.796	-184.798
NHTBH_N2				13.6844	-109.606	-109.607
NHTBH_OH-				22.1507	-75.8602	-75.8607
NHTBH_OH				22.1224	-75.7936	-75.7941
NHTBH_TS01				32.221	-185.268	-185.27
NHTBH_TS02				16.8332	-100.984	-100.985
NHTBH_TS03				13.6735	-462.639	-462.64
NHTBH_TS04				100.668	-140.313	-140.315
NHTBH_TS05				10.0094	-200.205	-200.207
NHTBH_TS06				89.8881	-601.263	-601.265
NHTBH_TS07				101.299	-239.814	-239.815
NHTBH_TS09				96.8397	-963.115	-963.116
NHTBH_TS11				98.3441	-601.46	-601.461
NHTBH_TS13				127.582	-215.726	-215.728
NHTBH_TS15				17.6146	-110.083	-110.084
NHTBH_TS16				14.6942	-113.894	-113.895
NHTBH_TS17				137.239	-79.12	-79.1211
NHTBH_TS18				219.65	-118.466	-118.468
NHTBH_TS19				27.5815	-93.4063	-93.4073
Reaction energies automatically calculated from energies above
R1	R2	P1	P2	ZPVE	W2X	W3X-L
HTBH_H	HTBH_HCl	HTBH_TS01	NA	-3.23092	21.5123	21.0864
HTBH_OH	HTBH_H2	HTBH_TS02	NA	2.21239	22.5842	21.9084
HTBH_CH3	HTBH_H2	HTBH_TS03	NA	7.08128	49.7155	49.4012
HTBH_OH	HTBH_CH4	HTBH_TS04	NA	-6.26919	26.7163	26.08
HTBH_H	HTBH_H2	HTBH_TS05	NA	-3.05745	40.7057	40.657
HTBH_OH	HTBH_NH3	HTBH_TS06	NA	-2.1728	15.7637	13.694
HTBH_HCl	HTBH_CH3	HTBH_TS07	NA	4.04004	6.61479	6.22687
HTBH_OH	HTBH_C2H6	HTBH_TS08	NA	-6.14047	15.5678	14.8306
HTBH_F	HTBH_H2	HTBH_TS09	NA	-2.22051	6.33349	5.71892
HTBH_O	HTBH_CH4	HTBH_TS10	NA	-13.7933	60.1401	59.3655
HTBH_H	HTBH_PH3	HTBH_TS11	NA	-1.63426	12.1148	11.5854
HTBH_H	HTBH_OH	HTBH_TS12	NA	-3.31082	45.5788	45.1458
HTBH_H	HTBH_H2S	HTBH_TS13	NA	-2.4626	15.7845	15.2793
HTBH_O	HTBH_HCl	HTBH_TS14	NA	-8.10174	43.489	39.5869
HTBH_CH3	HTBH_NH2	HTBH_TS15	NA	1.26703	36.953	36.7656
HTBH_C2H5	HTBH_NH2	HTBH_TS16	NA	0.26537	38.9946	39.0155
HTBH_NH2	HTBH_C2H6	HTBH_TS17	NA	-3.44277	47.121	46.9941
HTBH_NH2	HTBH_CH4	HTBH_TS18	NA	-1.54017	58.2068	58.1353
HTBH_C5H8	NA	HTBH_TS19	NA	-9.316	166.061	166.865
HTBH_H2	HTBH_Cl	HTBH_TS01	NA	-11.7205	30.7193	30.0829
HTBH_H2O	HTBH_H	HTBH_TS02	NA	-4.81413	90.4982	89.8739
HTBH_CH4	HTBH_H	HTBH_TS03	NA	-5.66662	62.728	62.2976
HTBH_H2O	HTBH_CH3	HTBH_TS04	NA	-0.54781	81.6179	81.1489
HTBH_H2	HTBH_H	HTBH_TS05	NA	-3.05745	40.7057	40.657
HTBH_H2O	HTBH_NH2	HTBH_TS06	NA	3.92476	58.5974	56.7747
HTBH_CH4	HTBH_Cl	HTBH_TS07	NA	-17.1974	28.8342	28.1198
HTBH_H2O	HTBH_C2H5	HTBH_TS08	NA	0.12218	85.4499	85.0262
HTBH_HF	HTBH_H	HTBH_TS09	NA	-0.27695	140.421	140.136
HTBH_OH	HTBH_CH3	HTBH_TS10	NA	3.023	36.9859	36.7568
HTBH_H2	HTBH_PH2	HTBH_TS11	NA	-0.36203	103.538	102.968
HTBH_H2	HTBH_O	HTBH_TS12	NA	-7.37926	55.7206	54.858
HTBH_H2	HTBH_HS	HTBH_TS13	NA	-5.19312	72.2728	71.6781
HTBH_OH	HTBH_Cl	HTBH_TS14	NA	-12.5229	42.5542	38.8711
HTBH_CH4	HTBH_NH	HTBH_TS15	NA	-7.5848	92.0917	91.6709
HTBH_C2H6	HTBH_NH	HTBH_TS16	NA	-9.12773	79.1528	78.7941
HTBH_NH3	HTBH_C2H5	HTBH_TS17	NA	-3.27768	74.1694	74.109
HTBH_NH3	HTBH_CH3	HTBH_TS18	NA	-1.91635	70.2747	70.1235
HTBH_C5H8	NA	HTBH_TS19	NA	-9.316	166.061	166.865
NHTBH_H	NHTBH_N2O	NHTBH_TS01	NA	4.05941	73.3145	72.6945
NHTBH_H	NHTBH_HF	NHTBH_TS02	NA	-7.41409	175.775	175.277
NHTBH_H	NHTBH_HCl	NHTBH_TS03	NA	-4.02776	73.5458	72.6839
NHTBH_H	NHTBH_CH3F	NHTBH_TS04	NA	-1.48489	127.324	125.971
NHTBH_H	NHTBH_F2	NHTBH_TS05	NA	4.06495	18.0889	18.234
NHTBH_CH3	NHTBH_FCl	NHTBH_TS06	NA	7.98309	29.4144	28.1086
NHTBH_F-	NHTBH_CH3F	NHTBH_TS07	NA	-0.85464	-1.70516	-2.64052
NHTBH_FCH3Fcomp	NA	NHTBH_TS07	NA	-1.80354	56.3193	55.6645
NHTBH_Cl-	NHTBH_CH3Cl	NHTBH_TS09	NA	-1.41328	11.5606	10.3411
NHTBH_ClCH3Clcomp	NA	NHTBH_TS09	NA	-2.14698	56.8166	55.7668
NHTBH_F-	NHTBH_CH3Cl	NHTBH_TS11	NA	0.09109	-51.2266	-52.2323
NHTBH_FCH3Clcomp1	NA	NHTBH_TS11	NA	-0.48936	14.4347	13.8188
NHTBH_OH-	NHTBH_CH3F	NHTBH_TS13	NA	3.27807	-10.3235	-11.5055
NHTBH_HOCH3Fcomp2	NA	NHTBH_TS13	NA	0.43067	47.0416	46.1192
NHTBH_H	NHTBH_N2	NHTBH_TS15	NA	3.9302	60.9557	60.494
NHTBH_H	NHTBH_CO	NHTBH_TS16	NA	2.01879	13.6836	13.1991
NHTBH_H	NHTBH_C2H4	NHTBH_TS17	NA	5.25525	8.49116	7.97188
NHTBH_CH3	NHTBH_C2H4	NHTBH_TS18	NA	10.4494	26.7188	25.4778
NHTBH_HCN	NA	NHTBH_TS19	NA	-13.7862	200.753	200.403
NHTBH_OH	NHTBH_N2	NHTBH_TS01	NA	-3.58578	345.459	343.442
NHTBH_HF	NHTBH_H	NHTBH_TS02	NA	-7.41409	175.775	175.277
NHTBH_HCl	NHTBH_H	NHTBH_TS03	NA	-4.02776	73.5458	72.6839
NHTBH_HF	NHTBH_CH3	NHTBH_TS04	NA	-0.79638	237.496	236.582
NHTBH_HF	NHTBH_F	NHTBH_TS05	NA	-14.2379	450.06	448.499
NHTBH_CH3F	NHTBH_Cl	NHTBH_TS06	NA	-12.2651	250.284	247.932
NHTBH_CH3F	NHTBH_F-	NHTBH_TS07	NA	-0.85464	-1.70516	-2.64052
NHTBH_FCH3Fcomp	NA	NHTBH_TS07	NA	-1.80354	56.3193	55.6645
NHTBH_CH3Cl	NHTBH_Cl-	NHTBH_TS09	NA	-1.41328	11.5606	10.3411
NHTBH_ClCH3Clcomp	NA	NHTBH_TS09	NA	-2.14698	56.8166	55.7668
NHTBH_CH3F	NHTBH_Cl-	NHTBH_TS11	NA	-3.80909	84.336	83.0619
NHTBH_FCH3Clcomp2	NA	NHTBH_TS11	NA	-4.82975	124.649	123.523
NHTBH_CH3OH	NHTBH_F-	NHTBH_TS13	NA	-5.63415	74.1747	72.939
NHTBH_HOCH3Fcomp1	NA	NHTBH_TS13	NA	-3.39563	199.583	198.432
NHTBH_HN2	NA	NHTBH_TS15	NA	-17.7447	45.5312	45.512
NHTBH_HCO	NA	NHTBH_TS16	NA	-19.056	95.4713	95.283
NHTBH_CH3CH2	NA	NHTBH_TS17	NA	-16.9999	176.142	175.618
NHTBH_CH3CH2CH2	NA	NHTBH_TS18	NA	-9.88446	138.132	136.385
NHTBH_HNC	NA	NHTBH_TS19	NA	-12.5298	137.79	137.21

## Sheet: Table S2
Table S2. Zero-point vibrational energies (kJ mol–1), W2X and W3X-L vibrationless energies (hartree) for the species in the "CO3" set, and the corresponding reaction energies (kJ mol–1)
Computed vibrationless energies go here, NA should always be zero
Species				ZPVE	W2X	W3X-L
NA				0	0	0
CO3A_s03				30.6578	-263.775	-263.78
CO3A_s04				37.9865	-263.851	-263.858
CO3A_sTS02				30.3649	-263.775	-263.782
CO3A_t01				40.8749	-263.821	-263.827
CO3A_tTS01				29.1626	-263.815	-263.82
CO3B_S01				37.9861	-263.851	-263.858
CO3B_S02				35.8874	-263.86	-263.862
CO3B_S03T				35.1456	-263.814	-263.818
CO3B_S04T				31.4887	-263.848	-263.853
CO3B_S05T				32.2168	-263.792	-263.801
CO3B_T01				29.2142	-263.759	-263.761
CO3B_T02				29.6355	-263.758	-263.761
CO3B_T03T				25.1062	-263.759	-263.762
CO3B_T04T				25.302	-263.758	-263.761
CO3B_T05T				27.0196	-263.729	-263.733
CO3B_T06T				27.2467	-263.752	-263.755
CO3B_T07T				31.7984	-263.747	-263.749
CO3B_T08				40.8838	-263.821	-263.827
CO3B_T09T				29.1606	-263.815	-263.82
CO3C_T01T				55.9918	-264.398	-264.401
CO3C_T02T				56.9907	-264.407	-264.41
CO3C_T03T				55.5476	-264.396	-264.399
CO3C_T04T				59.4098	-264.403	-264.405
CO3C_tHOOCO				61.8759	-264.419	-264.421
CO3X_CO				12.7157	-113.399	-113.4
CO3X_CO2				29.9911	-188.73	-188.732
CO3X_C_s				0	-37.8117	-37.8139
CO3X_C_t				0	-37.8625	-37.863
CO3X_HCO				33.7591	-113.93	-113.931
CO3X_HCO3				66.7561	-264.527	-264.531
CO3X_HO				22.2022	-75.7937	-75.7941
CO3X_HO2				37.2355	-151.025	-151.026
CO3X_O2_s				8.56295	-150.391	-150.401
CO3X_O2_t				9.32652	-150.438	-150.439
CO3X_O3				19.2064	-225.6	-225.604
CO3X_O_s				0	-75.0436	-75.049
CO3X_O_t				0	-75.1232	-75.1235
Reaction energies automatically calculated from energies above
R1	R2	P1	P2	ZPVE	W2X	W3X-L
CO3X_CO2	CO3X_O_t	CO3B_T09T	NA	-0.83042	100.05	91.0232
CO3X_CO2	CO3X_O_t	CO3B_T05T	NA	-2.97145	326.763	320.876
CO3X_CO2	CO3X_O_t	CO3B_T06T	NA	-2.74437	265.169	261.729
CO3B_T01	NA	CO3B_T07T	NA	2.58417	30.8402	30.9441
CO3B_T01	NA	CO3B_T03T	NA	-4.10802	-0.818631	-2.16961
CO3B_T02	NA	CO3B_T04T	NA	-4.33354	0.634321	-0.952216
CO3X_CO2	CO3X_O_s	CO3B_S03T	NA	5.15454	-104.817	-98.6406
CO3B_S02	NA	CO3B_S04T	NA	-4.39868	30.8656	23.0198
CO3X_CO2	CO3X_HO	CO3C_T02T	NA	4.7975	306.773	304.637
CO3C_tHOOCO	NA	CO3C_T01T	NA	-5.8841	54.3016	52.6855
CO3B_T08	NA	CO3B_T09T	NA	-11.7231	16.433	17.5591
CO3B_T01	NA	CO3B_T05T	NA	-2.19462	78.4807	74.7274
CO3B_T02	NA	CO3B_T06T	NA	-2.38886	14.8375	13.6899
CO3B_T02	NA	CO3B_T07T	NA	2.16285	28.791	29.0546
CO3X_CO	CO3X_O2_t	CO3B_T03T	NA	3.06399	204.207	201.064
CO3X_CO	CO3X_O2_t	CO3B_T04T	NA	3.25979	207.709	204.171
CO3B_S02	NA	CO3B_S03T	NA	-0.74176	122.335	115.945
CO3B_S01	NA	CO3B_S04T	NA	-6.49744	5.94886	12.6997
CO3C_tHOOCO	NA	CO3C_T02T	NA	-4.88515	31.3461	29.8112
CO3X_CO	CO3X_HO2	CO3C_T01T	NA	6.04058	67.6476	66.3124
CO3X_CO2	CO3X_O_s	CO3A_s03	NA	0.66673	-3.92063	0.611584

## Sheet: Table S3
Table S3. Zero-point vibrational energies (kJ mol–1), W2X and W3X-L vibrationless energies (hartree) for the species in the vinylperoxy radical set, and the corresponding reaction energies (kJ mol–1)
Computed vibrationless energies go here, NA should always be zero
Species				ZPVE	W2X	W3X-L
NA				0	0	0
VO_TS10				119.306	-228.433	-228.436
VO_TS11				119.485	-228.413	-228.416
VO_TS12				119.32	-228.508	-228.509
VO_TS13				120.72	-228.505	-228.508
VO_TS14				111.606	-228.486	-228.488
VO_TS5				107.565	-228.383	-228.385
VO_TS6				117.971	-228.411	-228.414
VO_TS7				117.974	-228.388	-228.391
VO_W1				123.802	-228.45	-228.452
VO_W2				118.045	-228.406	-228.408
VO_W3				119.571	-228.432	-228.434
VO_W4				125.008	-228.419	-228.421
VO_W5				122.105	-228.507	-228.51
VO_W6				120.001	-228.521	-228.524
VO_W7				121.352	-228.553	-228.554
VO_W8				127.097	-228.555	-228.557
Reaction energies automatically calculated from energies above
R1	R2	P1	P2	ZPVE	W2X	W3X-L
VO_W1	NA	VO_TS5	NA	-16.2375	176.704	176.279
VO_W1	NA	VO_TS6	NA	-5.83115	102.825	101.027
VO_W1	NA	VO_TS7	NA	-5.82849	162.634	161.229
VO_W3	NA	VO_TS10	NA	-0.26542	-1.65236	-4.01098
VO_W4	NA	VO_TS11	NA	-5.52277	13.4283	10.884
VO_W5	NA	VO_TS12	NA	-2.7857	-1.38684	0.952978
VO_W5	NA	VO_TS13	NA	-1.38557	5.34862	5.07438
VO_W7	NA	VO_TS14	NA	-9.74589	175.404	174.944
VO_W2	NA	VO_TS5	NA	-10.4804	60.3705	59.3027
VO_W3	NA	VO_TS6	NA	-1.6001	56.7969	53.566
VO_W4	NA	VO_TS7	NA	-7.03421	80.452	77.9075
VO_W5	NA	VO_TS10	NA	-2.79961	195.472	193.622
VO_W6	NA	VO_TS11	NA	-0.51574	281.991	282.387
VO_W7	NA	VO_TS12	NA	-2.03199	117.907	118.961
VO_W6	NA	VO_TS13	NA	0.71888	40.6323	43.084
VO_W8	NA	VO_TS14	NA	-15.4918	181.729	181.596
